# Supplementary material for: Large Scale Anthropogenic Reduction of Forest Cover in Last Glacial Maximum Europe
Source: PLOS journal article supplement (doi:10.1371/journal.pone.0166726), 2016-11-30
Supplement: S2 (10.1371/journal.pone.0166726.s002) [file journal.pone.0166726.s002.pdf]

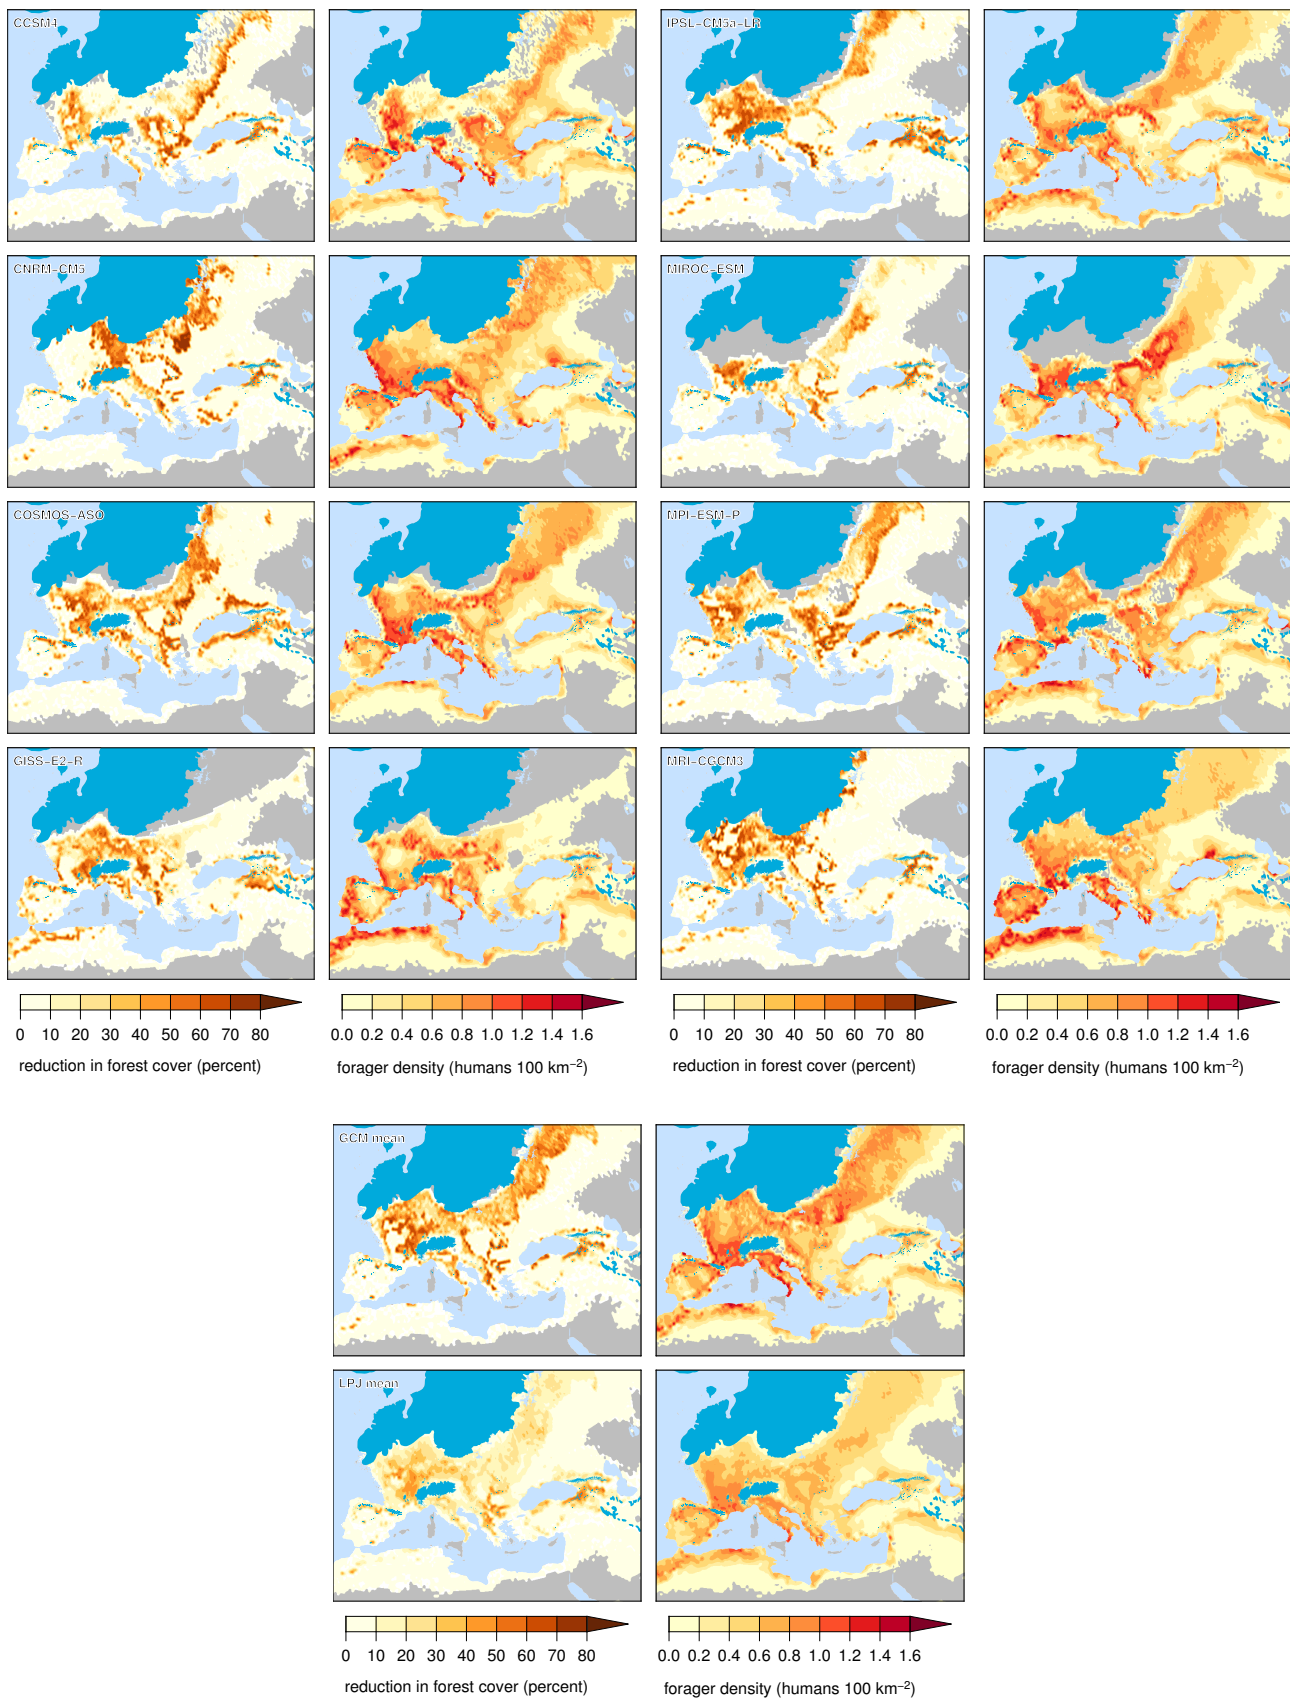

**Fig. S2. Simulated forager population density and associated reduction in tree cover.** The reduction in tree cover between a simulation with and without human burning (**left panels**) and the associated simulated forager population density (**right panels**). Results are shown for LPJ-LMfire runs driven by each of the eight GCM climate simulations, and the multi-model ensemble means.
