# Supplementary material for: Large Scale Anthropogenic Reduction of Forest Cover in Last Glacial Maximum Europe
Source: PLOS journal article supplement (doi:10.1371/journal.pone.0166726), 2016-11-30
Supplement: S3 (10.1371/journal.pone.0166726.s003) [file journal.pone.0166726.s003.pdf]

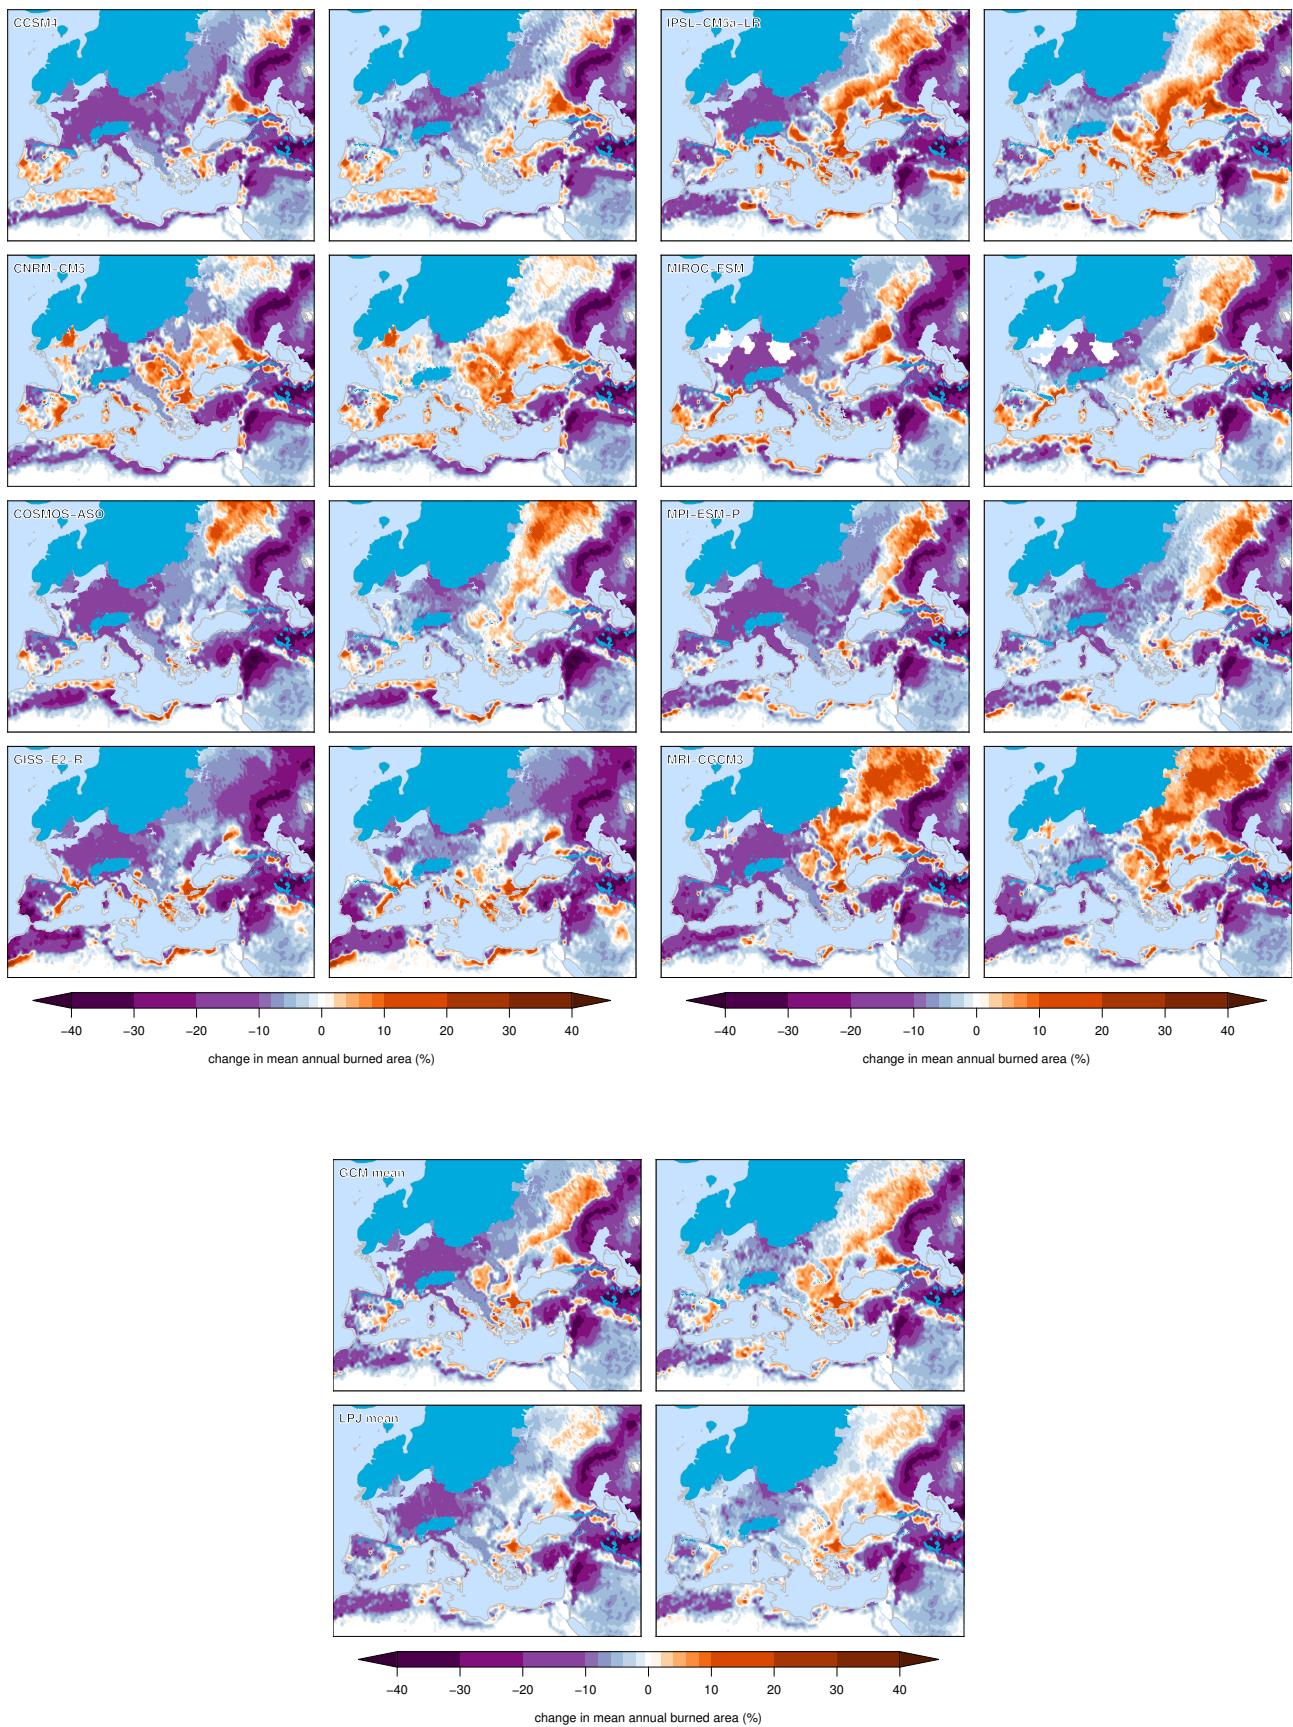

**Fig. S3. Change in burned area fraction between LGM and the Preindustrial Holocene (PIH).** Difference in mean annual burned area fraction for each of the individual GCM LGM climate scenarios compared to a PIH simulation. **Left panels**, scenarios without human burning at LGM, **right panels**, with human burning.
