# Supplementary material for: Large Scale Anthropogenic Reduction of Forest Cover in Last Glacial Maximum Europe
Source: PLOS journal article supplement (doi:10.1371/journal.pone.0166726), 2016-11-30
Supplement: S5 (10.1371/journal.pone.0166726.s005) [file journal.pone.0166726.s005.pdf]

**S2 Table. 150-year mean tree cover for the map area covered by Fig. 2 for the eight different GCM climate input scenarios, and one scenario using the mean climatology of the 8 different scenarios.**

Values in parentheses are the 1- $\sigma$  temporal variability of the individual GCM scenarios, and the 1- $\sigma$  variability across scenarios for the LPJ mean.

| GCM scenario            | Tree cover ( $10^6$ km <sup>2</sup> ) |                    |                   |
|-------------------------|---------------------------------------|--------------------|-------------------|
|                         | Without humans                        | With humans        | Decrease (%)      |
| CCSM4                   | 4.93 (0.11)                           | 4.07 (0.09)        | 17.3              |
| CNRM-CM5                | 2.78 (0.11)                           | 1.81 (0.07)        | 35.1              |
| COSMOS-ASO              | 3.92 (0.09)                           | 2.65 (0.06)        | 32.4              |
| GISS-E2-R               | 3.13 (0.10)                           | 2.18 (0.06)        | 30.4              |
| IPSL-CM5a               | 3.06 (0.07)                           | 1.94 (0.05)        | 36.6              |
| MIROC-ESM               | 2.59 (0.09)                           | 1.88 (0.05)        | 27.3              |
| MPI-CGCM3               | 3.40 (0.09)                           | 2.47 (0.05)        | 27.2              |
| MPI-ESM-P               | 4.44 (0.08)                           | 3.25 (0.07)        | 26.8              |
| <b>LPJ mean</b>         | <b>3.53 (0.83)</b>                    | <b>2.53 (0.97)</b> | <b>29.1 (6.0)</b> |
| <i>GCM mean climate</i> | <i>3.90 (0.10)</i>                    | <i>2.62 (0.06)</i> | <i>32.5</i>       |
